# Supplementary material for: Targeted Proteomics Reveals Quantitative Differences in Low-Abundance Glycosyltransferases of Patients with Congenital Disorders of Glycosylation
Source: Int J Mol Sci. 2024 Jan 18;25(2):1191. doi: 10.3390/ijms25021191 (PMC10816918; doi:10.3390/ijms25021191)
Supplement: Supplementary file 1 [file ijms-25-01191-s001.zip › Table S4.xlsx]

## Sheet: Table S4
	CDG Type			Alg1-CDG									Alg2-CDG			Alg11_II-CDG									Alg11_I-CDG			Controls
	Patient ID			Alg1-A			Alg1-B			Alg1-C			Alg2			Alg11-A			Alg11-B			Alg11-C			Alg11-D			Ctrl-A			Ctrl-B				Ctrl-C				Ctrl-D
	Cell Pellet ID (biol. Rep.)			Alg1-A-1	Alg1-A-2	Alg1-A-3	Alg1-B-1	Alg1-B-2	Alg1-B-3	Alg1-C-1	Alg1-C-2	Alg1-C-3	Alg2-1	Alg2-2	Alg2-3	Alg11-A-1	Alg11-A-2	Alg11-A-3	Alg11-B-1	Alg11-B-2	Alg11-B-3	Alg11-C-1	Alg11-C-2	Alg11-C-3	Alg11-D-1	Alg11-D-2	Alg11-D-3	Ctrl-A-1	Ctrl-A-2	Ctrl-A-3	Ctrl-B-1	Ctrl-B-2	Ctrl-B-3	Ctrl-B-4	Ctrl-C-1	Ctrl-C-2	Ctrl-C-3	Ctrl-C-4	Ctrl-D-1	Ctrl-D-2	Ctrl-D-3
Probe Name	Accession #	Class Name	Target Sequence
ALG1	NM_019109.4	Endogenous	GGTCTGCCTAGCATTGCTGTCTGCTGGTTCGTGGGCTGCCTTTGTGGAAGCAAGCTCGTCATTGACTGGCACAACTATGGCTACTCCATCATGGGTCTGG	302	1028	497	1078	1078	2240	832	1259	513	1250	436	615	291	283	349	430	294	412	427	820	408	1016	1121	506	236	865	1529	1528	1367	739	450	1584	1347	243	442	1273	437	1372
ALG11	NM_001004127.2	Endogenous	TGGTGTGCTTTAAGAGCCCTGCAGAAAAAGTATCCTGAAGCAGTTTATGTTGTTTATACCGGCGATGTTAATGTCAACGGTCAACAGATACTAGAAGGTG	212	698	411	764	628	848	663	778	317	741	290	450	209	150	215	255	150	322	201	406	192	800	734	396	132	594	1046	904	894	620	356	1066	976	260	398	854	279	879
ALG12	NM_024105.3	Endogenous	CCAAGTTTTACTCTCAGCTAATAGTTAGAGGAGTGCTTGGACTCGGCGTGATTTTTGGACTCTGGACGTTACAAAAGGAAGTGAGACGGCACTTCGGGGC	223	710	222	662	602	1121	529	725	187	1076	221	353	187	148	211	244	148	260	287	597	290	712	736	248	117	544	1235	1051	803	190	217	1127	999	161	212	910	289	934
ALG13	NM_001039210.3	Endogenous	AGGTGCAGGAAGCTGTTTGGAGACTCTGGAAAAAGGAAAGCCACTCGTAGTGGTTATAAACGAAAAGTTGATGAACAATCATCAGCTGGAACTGGCAAAG	266	838	376	803	626	1320	836	857	418	934	439	580	223	208	278	325	203	336	381	715	301	948	907	470	235	807	1320	1278	1128	685	406	1261	1148	236	396	1010	407	1098
ALG14	NM_144988.3	Endogenous	CCAAATACTACATTCACCGAATTCCAAGAAGCCGGGAGGTTCAGCAGTCCTGGCCCTCCACCGTTTTCACCACCTTGCACTCCATGTGGCTCTCCTTTCC	201	759	256	682	485	1295	552	694	159	700	135	269	189	166	170	270	199	243	276	493	247	755	857	218	75	547	1181	1003	836	344	171	895	847	205	283	949	289	951
ALG2	NM_033087.3	Endogenous	TCCGACCTTGGCCAGTATGTGACCTTCTTGAGGTCTTTCTCAGACAAACAGAAAATCTCCCTCCTCCACAGCTGCACGTGTGTGCTTTACACACCAAGCA	331	957	488	1000	1037	1835	737	706	252	729	275	394	312	250	391	411	283	583	390	759	359	1111	906	503	144	830	1604	1280	1191	768	483	1687	1476	324	472	1122	486	1237
ALG3	NM_001006941.2	Endogenous	CCAGCCGAGGCACTGACATCCGCATGGCCCAGAACATCTTTGCTGTGCTCTACCTGGCTACCTTGCTGCTTGTCTTCTTGATCTATCACCAGACCTGCAA	249	846	379	1013	738	1693	735	1057	411	1058	329	567	260	174	267	335	198	388	336	603	295	770	828	326	89	624	1330	1511	1416	734	529	1760	1646	240	509	1288	487	1195
ALG5	NM_013338.4	Endogenous	TATGGAAGTGACAAAGTACGTGTGATAACCCTGGTGAAGAATCGTGGAAAAGGTGGAGCGATTAGAATGGGTATATTCAGTTCTCGAGGAGAAAAGATCC	408	1393	780	1390	1185	2347	1101	1321	786	1853	590	1004	305	275	418	517	359	662	424	901	433	1336	1153	618	303	942	2149	2210	1769	1415	802	2295	2100	383	736	1738	728	1834
ALG8	NM_001007027.2	Endogenous	TACCATTCCACAGATTTTGAAGTACACCGAAACTGGCTTGCTATCACTCACAGTTTGCCAATATCACAGTGGTATTATGAGGCAACTTCAGAGTGGACGT	270	1020	361	1146	881	1754	795	1309	475	1296	283	489	317	202	287	347	215	268	372	712	366	932	920	309	119	849	1489	1751	1371	292	287	1334	1235	269	316	1415	482	1307
ALG9	NM_001077690.1	Endogenous	GTCATGAAACACAGGTGGAAGAGTTTCTTTCATTGGTCGCTGATGGCCCTCATACTATTTCTGGTGCCTGTGGTGGTCATTGACAGCTACTATTATGGGA	162	647	274	608	398	895	454	619	265	622	164	332	110	115	149	223	121	246	279	519	199	610	640	240	91	487	931	830	662	242	147	879	839	112	228	690	221	634
C1orf43	NM_015449.2	Endogenous	ATTCGACTCTCCAGGGTTCAGGATATCAAGTATGAGCCCCAGCTCCTTGCAGATGATGATGCTAGACTACTACAACTGGAAACCCAGGGAAATCAAAGTT	724	2572	1824	2354	2275	5452	2223	2620	1496	3574	1782	2705	636	618	825	893	839	1639	951	2446	1216	2886	2505	1562	763	2586	6302	3881	3389	1766	1790	4504	3861	779	1447	3981	1599	3959
ALG7	NM_001382.3	Endogenous	GGCTGCTGGCAGTGTTCTGTACCAATGCCATCAATATCCTAGCAGGAATTAACGGCCTAGAGGCTGGCCAGTCACTAGTCATTTCTGCTTCCATCATTGT	253	875	494	833	843	1368	664	1060	391	1319	485	646	199	176	276	327	252	418	316	699	329	849	762	483	260	746	1333	1138	1065	386	533	1208	1057	222	448	916	412	995
DPM1	NM_003859.1	Endogenous	AAATATTCGGTGCTTTTACCTACCTACAACGAGCGCGAGAACCTGCCGCTCATCGTGTGGCTGCTGGTGAAAAGCTTCTCCGAGAGTGGAATCAACTATG	404	1514	856	1565	1094	2648	1228	1377	867	1443	776	1120	365	384	509	625	376	787	622	1064	564	1290	1368	740	357	1223	2444	2309	1863	1094	942	2387	2258	519	797	2052	652	1826
DPM3	NM_153741.1	Endogenous	GCCACTGCCCGCCTACTTGCTGGTGTCCGCCGGCTGCTATGCCCTGGGCACTGTGGGCTATCGTGTGGCCACTTTTCATGACTGCGAGGACGCCGCACGC	57	253	137	310	209	453	224	302	156	388	188	221	89	79	97	120	96	207	144	299	102	257	304	137	118	352	533	444	376	163	169	388	341	131	122	398	121	324
DPY19L1	NM_015283.1	Endogenous	TTGTGGATTGTCCTTCAGACCTTAGTCCTCAGGCATGGTTTCTGGTGCCCACTCCTGGAAGCCGCTGTTCCCTTTCTACCTTCTTACCAGAGCCCAAGGG	235	817	353	938	604	1682	685	886	518	1037	310	459	203	243	287	356	299	312	306	593	235	885	973	394	174	888	1528	1036	850	490	336	1474	1233	139	242	833	235	737
DPY19L3	NM_207325.2	Endogenous	TAATTAAGCCAATAATGATGCATGCCTGTTGTAGCTGACAGCATGGGTCAGTACATCCTTCAGCGAGTGCCTTACTCTAATTGAAACCAAGCACACGTAA	71	263	129	333	301	430	270	190	106	206	121	160	72	62	82	81	54	119	89	176	58	186	212	114	64	231	415	329	270	252	147	416	363	76	146	342	116	278
POMT1	NM_007171.3	Endogenous	ACTGCCAAAAGCACAGCCCTTTTTCTCTGAGCTGGTGGTTCTGGCTAACACTGACAGGGGTCGCTTGTTCCTGTGCAGTGGGCATCAAGTACATGGGTGT	80	265	165	321	188	503	217	293	181	391	174	209	72	70	79	98	99	135	158	330	178	310	303	184	90	325	553	379	303	121	149	426	378	99	130	316	110	401
POMT2	NM_013382.5	Endogenous	GCGTGTGTGTATGTGAGGGCATGTTGTCCATATCCCTGTGGAATACAGACCGTGTAACTGGACAGCTGAGTGTCATAAACTCTAAAATAGTCCAGGCTAT	91	253	152	263	212	470	250	270	111	324	61	144	52	48	88	81	58	80	83	158	102	329	241	129	49	280	509	270	230	96	67	416	376	114	112	260	146	324
RFT1	NM_052859.3	Endogenous	AGCTGCTTGAAGTGCCTGATCCTAATGTTGTCCCTCACTATGCAACTGGAGTGGTGCTGTTTGGTCTCTCGGCAGTGGTGGAGCTTCTAGGAGAGCCCTT	166	712	246	645	501	1155	556	714	303	566	185	314	155	140	162	239	157	257	199	372	185	554	579	188	119	499	861	1068	908	271	233	985	844	129	222	826	253	762
SNRPD3	NM_004175.3	Endogenous	CATTTTGGGAAAGAGTGGAATTCTGGGTGTTAGGCCCGCCATTCGCTTGACTCACGCCTTCGCCGTAGCATCTTTCGCAGCGGACCGAAGAGAAGAAAAG	169	854	271	841	586	1416	614	718	305	743	286	350	174	189	239	283	186	213	234	605	220	716	573	234	112	766	1211	987	1074	173	243	1124	1031	189	238	848	305	868
NEG_A	ERCC_00096.1	Negative	AACCGCCGCATACGGCCGATTGTCGCAGCCCGGGTCGATTATAACAACGGTGCAATCTCAGCTAAACCGACGCAGTTTTGCTCCTTGGATTCTGAGCCCG	4	17	9	18	15	8	33	20	3	13	7	9	6	7	9	5	4	8	12	13	12	16	11	5	3	17	24	17	22	7	3	15	16	3	7	25	4	13
NEG_B	ERCC_00041.1	Negative	GCACTGGCATTGGTCGTTTCAGGAGGCCATACAGAACTGGTTTATATGAAGGAACATGGATCATTTGAAGTCATTGGGGAAACCCTTGATGATGCGGCAG	29	125	38	92	78	37	119	167	74	70	34	47	39	38	41	55	34	60	63	66	46	115	168	65	19	86	118	136	156	80	56	153	138	31	56	163	41	122
NEG_C	ERCC_00019.1	Negative	GTACAGGCTGCTGGCTCATGTTTCCTTCTACGCTGCACTTGCGGGCATAGAGGTCGGTTGCGATCTATATTCGGAGATAACTATTCACCCAGCGCCACTC	33	91	45	88	72	44	109	135	68	85	25	41	38	37	32	47	31	50	58	78	53	104	158	34	17	89	124	183	141	84	60	162	151	34	60	168	38	90
NEG_D	ERCC_00076.1	Negative	AGAGATCACGTGGACCAAAGCTGATTGATTACGGGACTGGCCGTAAGTGCTGCCCGCGAGTAGATCGTCTAGATCCGGCTAAAATTCCCTGCGGTGCCTT	15	62	55	43	54	39	83	98	67	62	40	57	23	20	15	33	21	46	43	61	36	68	96	54	30	70	86	94	88	86	59	83	99	21	53	102	18	77
NEG_E	ERCC_00098.1	Negative	CCCAGATGACCTTCTCCCTCATAATCACTTAATCTGAGCGCAGGAGGCAGGCTGTATTAATTCCGGCCTCCAACCGGACCGTGGAACGACGCGACCAAGT	6	21	9	29	14	12	28	21	8	21	6	9	8	4	15	18	8	13	6	13	10	24	24	8	6	14	36	40	34	19	13	29	23	6	14	21	8	13
NEG_F	ERCC_00126.1	Negative	GGGTCCTTACCGGCTGTAAGCTCACTACAATCCAGGTACAGAGTGCGTTAACCGGCCATTAGAGGGCCGCTACACCCGTCAGAATTTAAACGTATGGGCG	1	7	10	3	3	5	4	9	6	10	4	7	5	6	2	5	5	11	2	5	3	5	3	3	3	4	12	8	5	6	9	12	6	3	13	8	2	7
POS_A	ERCC_00034.1	Positive	ACGAAGCTGTTCGGCCGCACGCAAGTACCTCCCACTTAGAAAGCGAATAACCCAACGACCGTGTTCAACCCTGGCCGTCTCTCAACCAGGTATGCAATCA	32243	29954	43554	28337	34603	22307	28679	22350	46833	37588	40076	51394	39870	34026	45564	43615	39036	45293	45402	36512	44872	30368	26384	40353	23010	29639	19642	16960	25738	47594	51089	17109	15292	39233	49394	18404	48755	33650
POS_B	ERCC_00112.1	Positive	ATGAAAGCGCTGCTACTATGATAAGAGTACACGTACAGGTCTCGCCCGATTGGATTATGGCGAGCTGCCGCATTGACGGACATACCTTTGAACGTAATCG	4088	3592	9961	3446	4327	2663	3456	2829	10256	4529	9448	11121	4926	4196	5814	5479	4787	9503	5658	4571	5465	3797	3206	9071	5917	3761	2479	2112	3112	10109	10957	2136	1955	5168	10777	2343	6495	4083
POS_C	ERCC_00002.1	Positive	GCCGCTTTCGCTCGGGTCTGCGGGTTATAGCTTTTCAGTCTCGACGGGCTAGCACACATCTGGTTGACTAGGCGCATAGTCGCCATTCACAGATTTGCTC	2017	1843	4182	1600	2122	1234	1728	1212	4255	2280	3935	4607	2488	2055	2949	2738	2457	3964	2805	2211	2787	1794	1425	3618	2463	1982	1283	904	1441	4067	4404	1085	943	2859	4423	1109	3439	2104
POS_D	ERCC_00092.1	Positive	TACCTGGCATTTGGGCACTTCTTGCGTTTAAGCGGGAAAGATCGCGAGGGCCCGCTATTTGCGATACTTCCCATGTCGGTGCCGTCGCCTCTATGTACTC	229	177	498	174	229	129	195	159	462	237	403	575	267	209	321	294	232	513	280	264	293	200	148	428	222	213	136	128	150	521	509	130	93	276	570	141	322	228
POS_E	ERCC_00035.1	Positive	GGTTGAATTTGAGCGGATGGGCTCAACTGCGTCGTAACCGGTAGATACAGGGCATACGAGCCTCCCTATTTAACGGCATCATCCCGCGTAGTGCTGGTCA	89	115	153	93	138	60	85	91	150	143	124	155	91	94	128	116	89	158	147	120	139	112	80	123	71	104	82	63	80	143	161	65	55	113	150	75	136	98
POS_F	ERCC_00117.1	Positive	TCAGGCCTTGCCCTTACTAATGGCGCGTTGTAACGGGCCTTGAGGGAATGTCACTATTGAGGCACCCGTTCGACCCTCAGAGATATACCATTCCGCCTAT	48	45	135	49	43	24	56	47	75	51	60	86	55	26	44	43	49	124	48	43	48	52	52	57	37	62	46	56	42	130	122	39	38	54	123	43	59	40
